# Supplementary figures and images for: Internet use, needs and expectations of web-based information and communication in childbearing women with type 1 diabetes
Source: Springer Nature journal article supplement (doi:10.1186/1472-6947-11-49), 2011-07-07

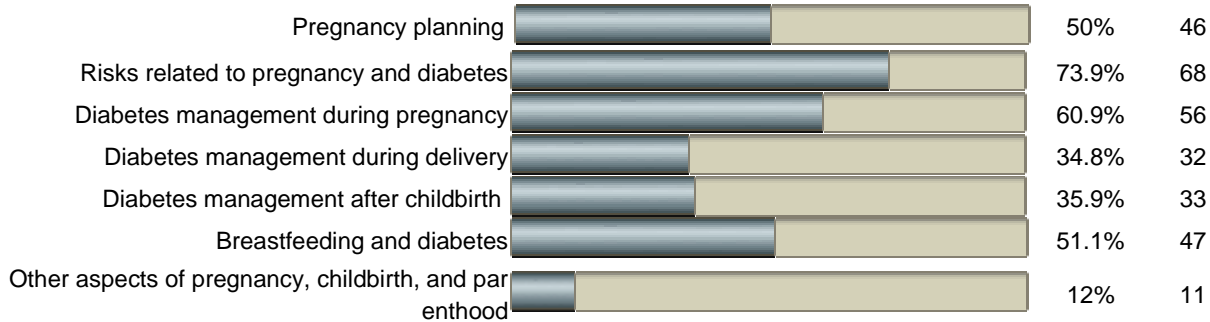

Supplement: 12911_2011_422_MOESM3_ESM.pdf [file 12911_2011_422_MOESM3_ESM.pdf]
